# Supplementary material for: Effects of Manganese on Genomic Integrity in the Multicellular Model Organism Caenorhabditis elegans
Source: MDPI journal article supplement (doi:10.3390/ijms222010905), 2021-10-09
Supplement: s1 [file s1]

# Effects of Manganese on Genomic Integrity in the Multicellular Model Organism *Caenorhabditis elegans*

Merle M. Nicolai <sup>1</sup>, Ann-Kathrin Weishaupt <sup>1,2</sup>, Jessica Baesler <sup>2,3</sup>, Vanessa Brinkmann <sup>4</sup>, Anna Wellenberg <sup>4</sup>, Nicola Winkelbeiner <sup>2,3</sup>, Anna Gremme <sup>1</sup>, Michael Aschner <sup>5</sup>, Gerhard Fritz <sup>4</sup>, Tanja Schwerdtle <sup>2,3,6</sup> and Julia Bornhorst <sup>1,2,3,\*</sup>

<sup>1</sup> Food Chemistry, Faculty of Mathematics and Natural Sciences, University of Wuppertal, Gaußstraße 20, 42119 Wuppertal, Germany; merle.nicolai@uni-wuppertal.de (M.M.N.); ann-kathrin.weishaupt@uni-wuppertal.de (A.-K.W.); anna.reimer@uni-wuppertal.de (A.G.)

<sup>2</sup> TraceAge—DFG Research Unit on Interactions of Essential Trace Elements in Healthy and Diseased Elderly (FOR 2558), Berlin-Potsdam-Jena-Wuppertal, 14558 Nuthetal, Germany; baesler@uni-potsdam.de (J.B.); winkelbeiner@uni-potsdam.de (N.W.); tanja.schwerdtle@uni-potsdam.de (T.S.)

<sup>3</sup> Department of Food Chemistry, Institute of Nutritional Science, University of Potsdam, Arthur-Scheunert-Allee 114–116, 14558 Nuthetal, Germany

<sup>4</sup> Institute of Toxicology, Medical Faculty, Heinrich Heine University Düsseldorf, Moorenstr.5, 40225 Düsseldorf, Germany; vanessa.brinkmann@uni-duesseldorf.de (V.B.); anna.wellenberg@hhu.de (A.W.); fritz@uni-duesseldorf.de (G.F.)

<sup>5</sup> Albert Einstein College of Medicine, Department of Molecular Pharmacology, Neuroscience and Pediatrics, Bronx, 10032 NY, USA; michael.aschner@einsteinmed.org

<sup>6</sup> German Federal Institute for Risk Assessment (BfR), Max-Dohrn-Strasse 8–10, 10589 Berlin, Germany

\* Correspondence: bornhorst@uni-wuppertal.de, Tel.: +49-202-439-3453

## Supplementary

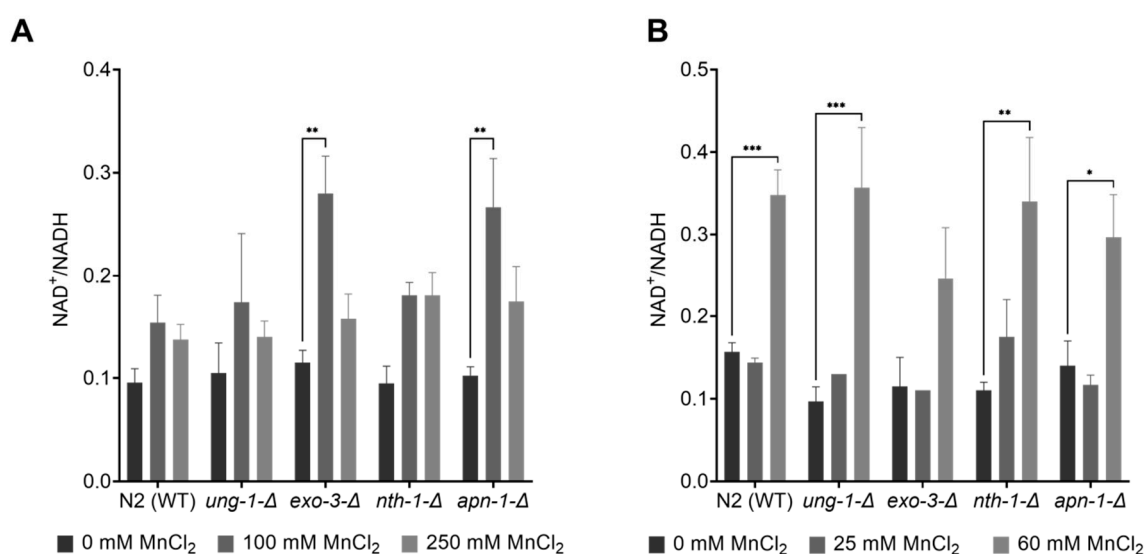

**Figure S1. Changes of the NAD<sup>+</sup>/NADH ratio as measure of oxidative stress.** Wild-type, N2 (WT), and BER-deletion mutants (*ung-1-Δ*, *exo-3-Δ*, *nth-1-Δ*, and *apn-1-Δ*) were incubated with MnCl<sub>2</sub> for (A) 1 h or (B) 4 h. Data are expressed as means ± SEM of at least three independent experiments. For statistical analysis, the unpaired *t*-test was performed. \*: *p* < 0.05, \*\*: *p* < 0.01, and \*\*\*: *p* < 0.005.
